# Supplementary material for: Effect of Iron Chloride (II) on Bentonites under Hydrothermal Gradients: A Comparative Study between Sodium Bentonite and Calcium Bentonite
Source: MDPI journal article supplement (doi:10.3390/min14020132), 2024-01-25
Supplement: s1 [file s1]

Porosity (blue); Steel heater (grey);  $\text{FeCl}_2$  (dark yellow); Bentonite (light yellow)
